# Supplementary material for: Properties of Potential Plant-Growth-Promoting Bacteria and Their Effect on Wheat Growth Promotion (Triticum aestivum) and Soil Characteristics
Source: MDPI journal article supplement (doi:10.3390/microbiolres15010002), 2023-12-19

**Table S1.** Description of soil samples, morphology of colonies and bacteria, phylogenetic trees for 17 strains participating in the experiment on the effect on plant growth.

| No    | 16S rRNA Identification   | GenBank Accession No. | Coordinates of the Terrain for Obtaining Soil | Date of Obtaining the Soil | Colony Color             | Colony Morphology                                            | Gram Staining | Form Bacteria |
|-------|---------------------------|-----------------------|-----------------------------------------------|----------------------------|--------------------------|--------------------------------------------------------------|---------------|---------------|
| GMG_9 | <i>Rothia endophytica</i> | OR497741              | 44.680935, 33.615939                          | 10.2021                    | white with a lilac shade | the colony is concentric in shape, the profile is flat, dull | Gram-positive | coccus        |

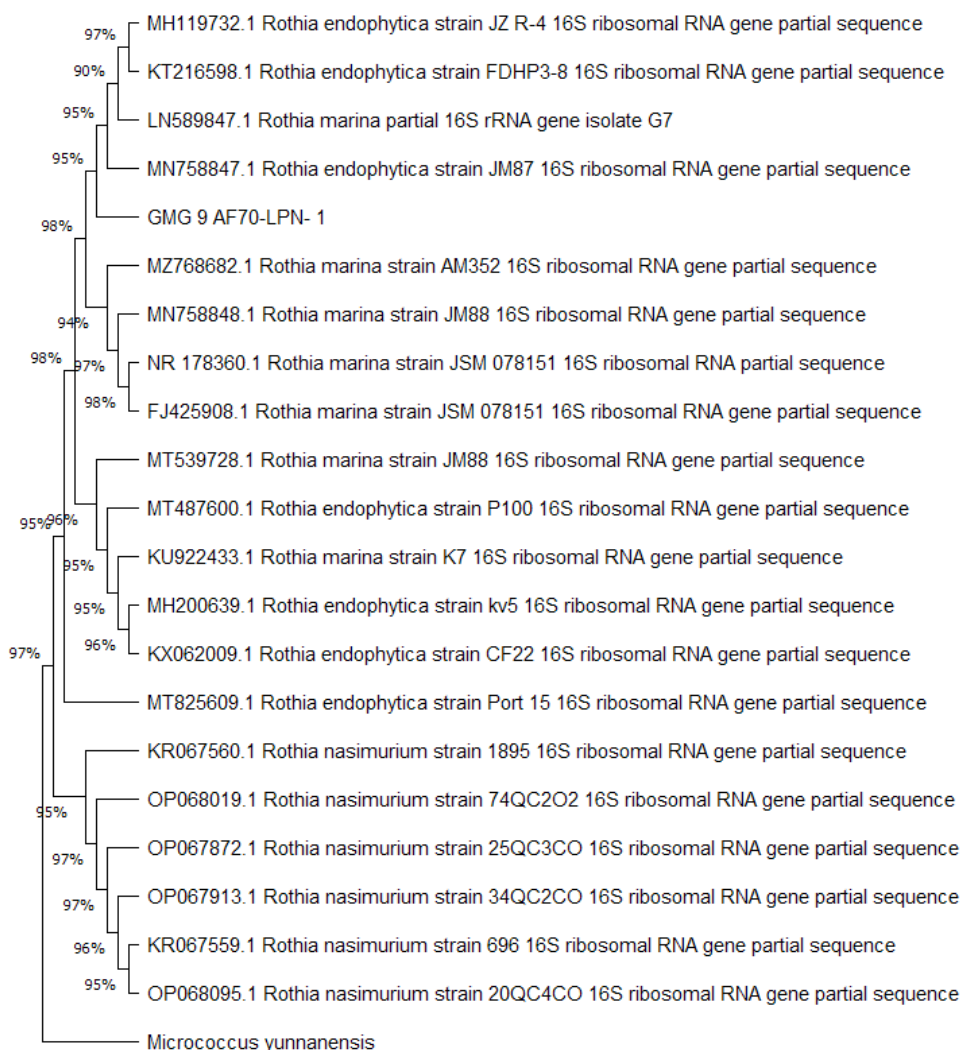

|                                                                                                                                                                                                                                                                                                                                                                                                                                                                                                                                                                                                                                                                                                                                                                                                                                                                                                                                                                                                                                                                                                                                                                                                                                                 |                                |              |                                 |             |               |                                                                                              |                       |                                  |
|-------------------------------------------------------------------------------------------------------------------------------------------------------------------------------------------------------------------------------------------------------------------------------------------------------------------------------------------------------------------------------------------------------------------------------------------------------------------------------------------------------------------------------------------------------------------------------------------------------------------------------------------------------------------------------------------------------------------------------------------------------------------------------------------------------------------------------------------------------------------------------------------------------------------------------------------------------------------------------------------------------------------------------------------------------------------------------------------------------------------------------------------------------------------------------------------------------------------------------------------------|--------------------------------|--------------|---------------------------------|-------------|---------------|----------------------------------------------------------------------------------------------|-----------------------|----------------------------------|
| GMG_11                                                                                                                                                                                                                                                                                                                                                                                                                                                                                                                                                                                                                                                                                                                                                                                                                                                                                                                                                                                                                                                                                                                                                                                                                                          | <i>Pseudomonas koreensis</i>   | OR49774<br>2 | 54.879<br>886,<br>83.111<br>747 | 10.202<br>1 | beige         | colony of<br>irregular<br>shape,<br>creeping,<br>shiny                                       | Gram-<br>negati<br>ve | rod<br>bacteriu<br>m             |
| <p>Phylogenetic tree showing the relationship between GMG11-AF70-LPN-H2 and other <i>Pseudomonas</i> strains. The tree is rooted with AB681884.1 <i>Azomonas insignis</i> gene for 16S rRNA partial sequence strain: NBRC 102609. The main cluster of <i>Pseudomonas</i> strains is supported by a 97% bootstrap value. Within this cluster, GMG11-AF70-LPN-H2 is closely related to MH144336.1 <i>Pseudomonas koreensis</i> strain PgBE266 16S ribosomal RNA gene partial sequence (91% bootstrap) and MH211310.1 <i>Pseudomonas koreensis</i> strain PgBe221 16S ribosomal RNA gene partial sequence (93% bootstrap). Other strains include KJ819580.1 <i>Pseudomonas putida</i> strain NBFPALD RAS137 16S ribosomal RNA gene partial sequence (94% bootstrap), MW471622.1 <i>Pseudomonas koreensis</i> 16S ribosomal RNA gene partial sequence (96% bootstrap), and OQ733323.1 <i>Pseudomonas atacamensis</i> strain KSS-6 16S ribosomal RNA gene partial sequence (94% bootstrap). The KT695840.1 <i>Pseudomonas fluorescens</i> strain 90F12-2 16S ribosomal RNA gene partial sequence and KT695838.1 <i>Pseudomonas fluorescens</i> strain 90D7A 16S ribosomal RNA gene partial sequence are sister taxa with 100% bootstrap support.</p> |                                |              |                                 |             |               |                                                                                              |                       |                                  |
| GMG_14                                                                                                                                                                                                                                                                                                                                                                                                                                                                                                                                                                                                                                                                                                                                                                                                                                                                                                                                                                                                                                                                                                                                                                                                                                          | <i>Pseudomonas silesiensis</i> | OR49774<br>3 | 54.879<br>886,<br>83.111<br>747 | 10.202<br>1 | colorle<br>ss | the colony is<br>round in<br>shape, the<br>surface is<br>smooth, the<br>profile is<br>convex | Gram-<br>negati<br>ve | rod-<br>shaped<br>bacteriu<br>m. |

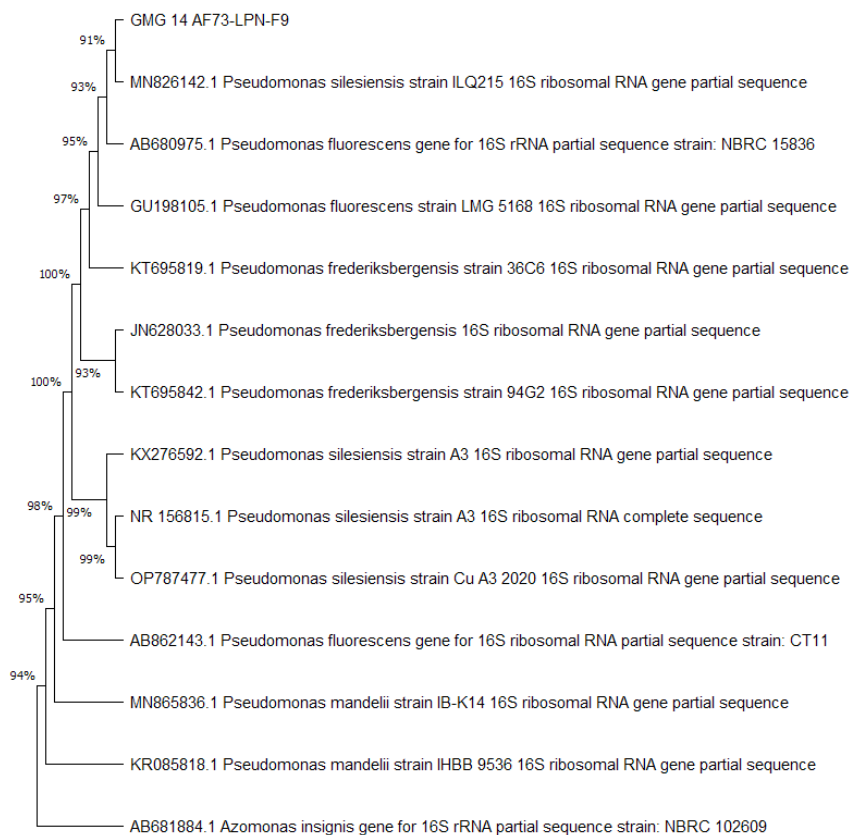

|        |                            |              |                                 |             |        |                                                                                                     |                       |                      |
|--------|----------------------------|--------------|---------------------------------|-------------|--------|-----------------------------------------------------------------------------------------------------|-----------------------|----------------------|
| GMG_20 | <i>Pantoea agglomerans</i> | OR49778<br>3 | 54.879<br>886,<br>83.111<br>747 | 10.202<br>1 | orange | the colony is<br>round in<br>shape, the<br>surface is<br>smooth, the<br>profile is<br>convex, shiny | Gram-<br>negati<br>ve | rod<br>bacteriu<br>m |
|--------|----------------------------|--------------|---------------------------------|-------------|--------|-----------------------------------------------------------------------------------------------------|-----------------------|----------------------|

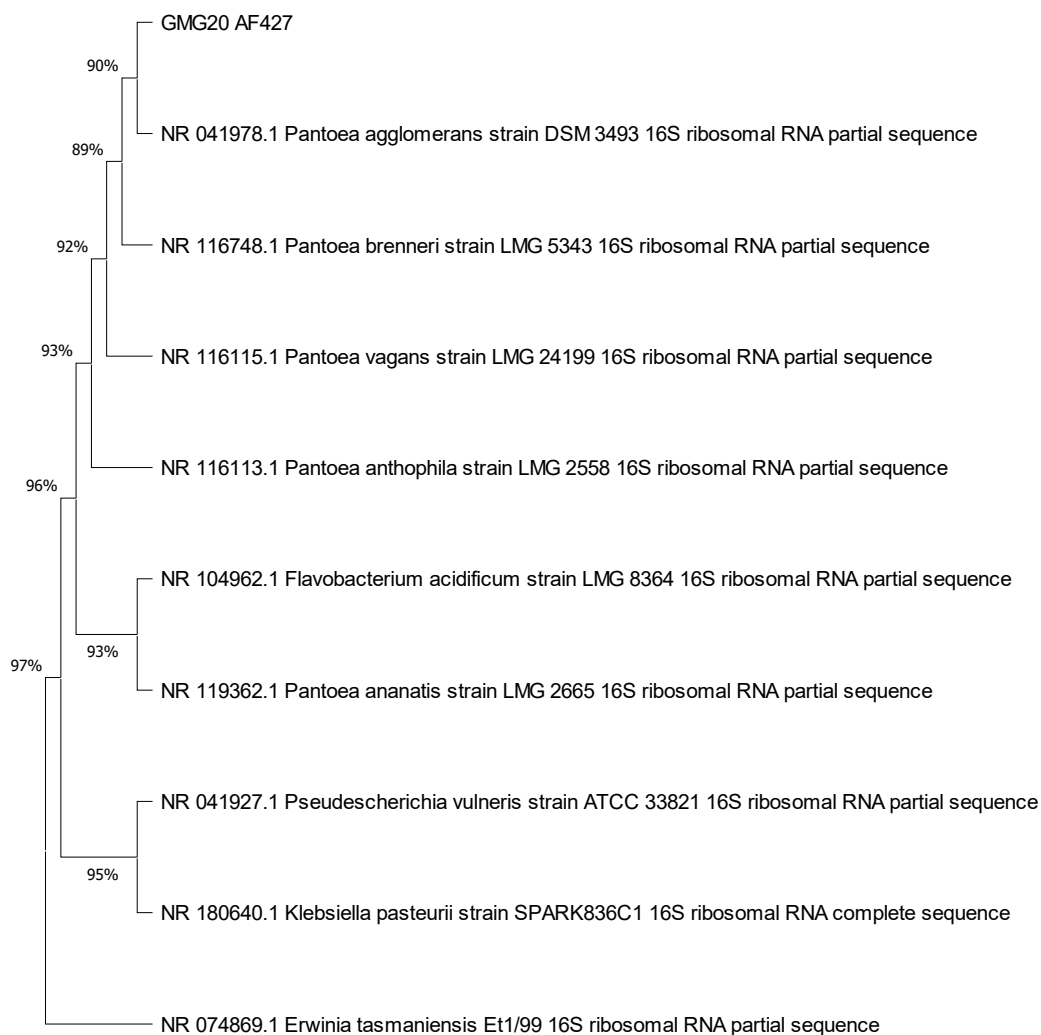

|        |                                 |              |                                 |             |                                       |                                                                                                         |                       |                   |
|--------|---------------------------------|--------------|---------------------------------|-------------|---------------------------------------|---------------------------------------------------------------------------------------------------------|-----------------------|-------------------|
| GMG_21 | <i>Rhodococcus erythropolis</i> | OR49774<br>4 | 54,879<br>886,<br>83,111<br>747 | 10,202<br>1 | white<br>with<br>an<br>orange<br>tint | the colony is<br>irregular in<br>shape, the<br>surface is<br>smooth, the<br>profile is<br>convex, shiny | Gram-<br>positiv<br>e | coccus-<br>shaped |
|--------|---------------------------------|--------------|---------------------------------|-------------|---------------------------------------|---------------------------------------------------------------------------------------------------------|-----------------------|-------------------|

|                                                                                                                                                                                                                                                                                                                                                                                                                                                                                                                                                                                                                                                                                                                                                                                                                                                                                                       |                             |          |                      |         |           |                                                                                     |               |                       |
|-------------------------------------------------------------------------------------------------------------------------------------------------------------------------------------------------------------------------------------------------------------------------------------------------------------------------------------------------------------------------------------------------------------------------------------------------------------------------------------------------------------------------------------------------------------------------------------------------------------------------------------------------------------------------------------------------------------------------------------------------------------------------------------------------------------------------------------------------------------------------------------------------------|-----------------------------|----------|----------------------|---------|-----------|-------------------------------------------------------------------------------------|---------------|-----------------------|
| <p>NR 104776.1 <i>Nocardia coeliaca</i> strain DSM 44595 16S ribosomal RNA partial sequence</p> <p>96%</p> <p>94%</p> <p>92%</p> <p>91%</p> <p>90%</p> <p>90%</p> <p>92%</p> <p>LC020106.1 <i>Rhodococcus erythropolis</i> gene for 16S ribosomal RNA partial sequence strain: LA73-1</p> <p>AJ131637.1 <i>Rhodococcus erythropolis</i> 16S rRNA gene strain DCL14 partial</p> <p>KF976880.1 <i>Rhodococcus erythropolis</i> strain K85 16S ribosomal RNA gene partial sequence</p> <p>FJ164059.1 <i>Actinobacterium</i> CH21i 16S ribosomal RNA gene partial sequence</p> <p>GMG21 AF72-NN-G6</p> <p>KX035054.1 <i>Rhodococcus erythropolis</i> strain ISE 16 16S ribosomal RNA gene partial sequence</p> <p>MT406572.1 <i>Nocardia coeliaca</i> strain Hal180 16S ribosomal RNA gene partial sequence</p> <p>AF532870.1 <i>Rhodococcus erythropolis</i> 16S ribosomal RNA gene partial sequence</p> |                             |          |                      |         |           |                                                                                     |               |                       |
| GMG_24                                                                                                                                                                                                                                                                                                                                                                                                                                                                                                                                                                                                                                                                                                                                                                                                                                                                                                | <i>Enterobacter cloacae</i> | OR497780 | 54,879,886,83.111747 | 10.2021 | colorless | the colony is round in shape, the surface is smooth, the profile is teardrop-shaped | Gram-negative | rod-shaped bacterium. |

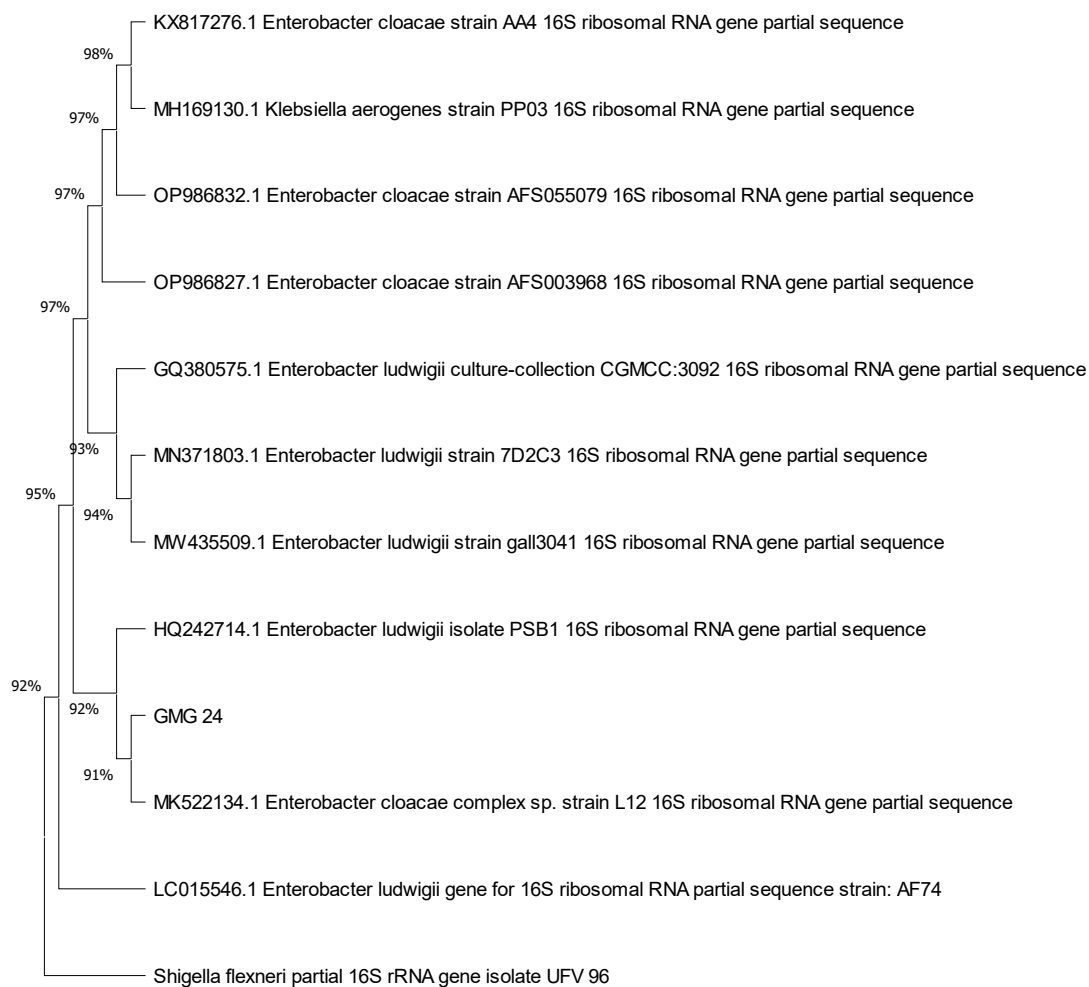

|        |                      |              |                                 |             |       |                                                                        |                       |                                 |
|--------|----------------------|--------------|---------------------------------|-------------|-------|------------------------------------------------------------------------|-----------------------|---------------------------------|
| GMG_27 | Variovorax paradoxus | OR49777<br>8 | 44.680<br>935,<br>33.615<br>939 | 10.202<br>1 | brown | the colony is<br>round in<br>shape, the<br>surface is<br>smooth, shiny | Gram-<br>negati<br>ve | rod-<br>shaped<br>bacteriu<br>m |
|--------|----------------------|--------------|---------------------------------|-------------|-------|------------------------------------------------------------------------|-----------------------|---------------------------------|

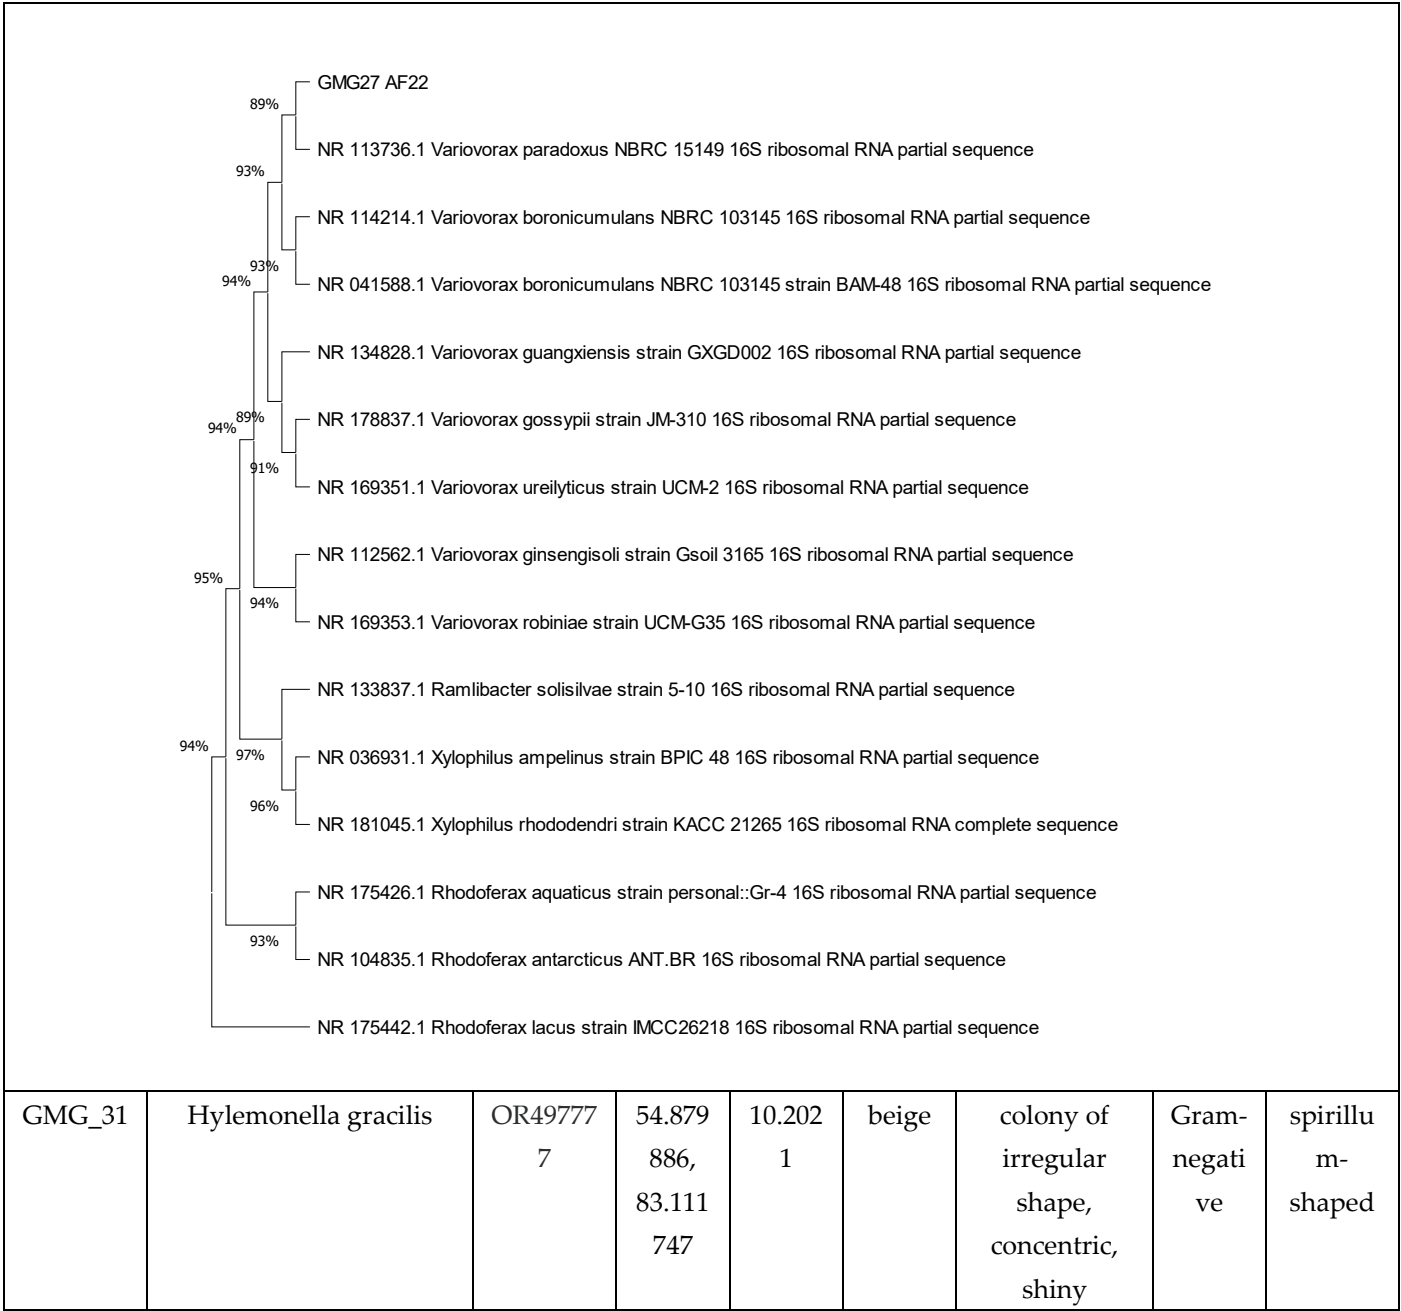

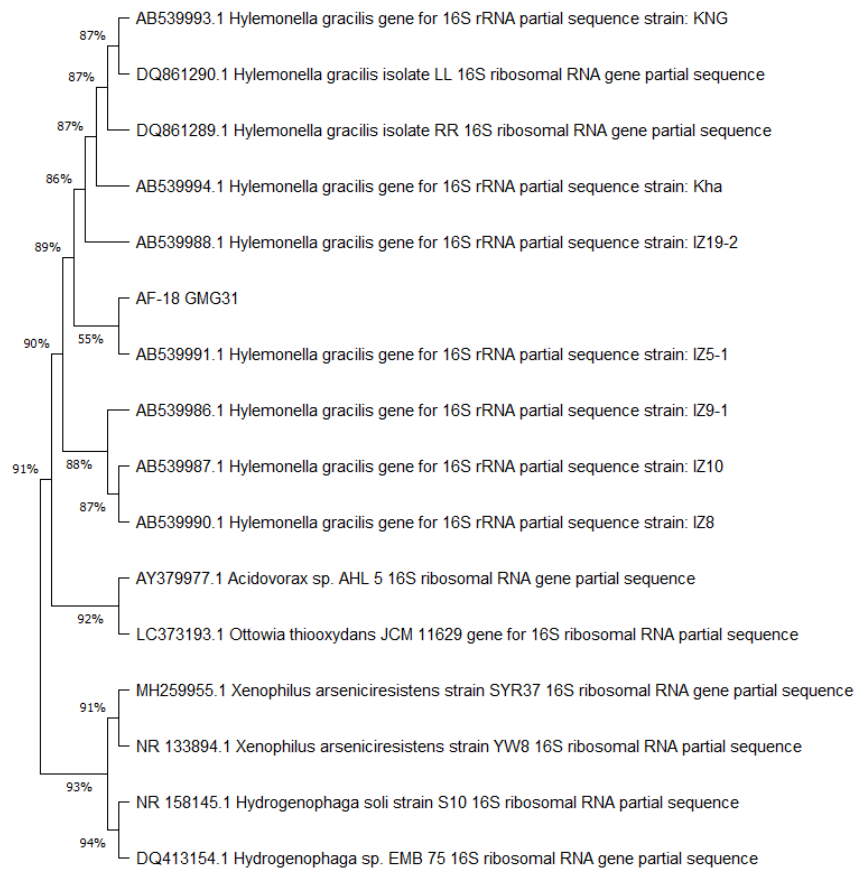

|              |                                |              |                                 |             |                 |                                          |                       |                                 |
|--------------|--------------------------------|--------------|---------------------------------|-------------|-----------------|------------------------------------------|-----------------------|---------------------------------|
| GMG_33.<br>4 | Agrobacterium<br>arsenijevicii | OR49778<br>2 | 56.115<br>2067,<br>37.528<br>61 | 10.202<br>1 | Light<br>yellow | the colony is<br>round,<br>convex, shiny | Gram-<br>negati<br>ve | rod-<br>shaped<br>bacteriu<br>m |
|--------------|--------------------------------|--------------|---------------------------------|-------------|-----------------|------------------------------------------|-----------------------|---------------------------------|



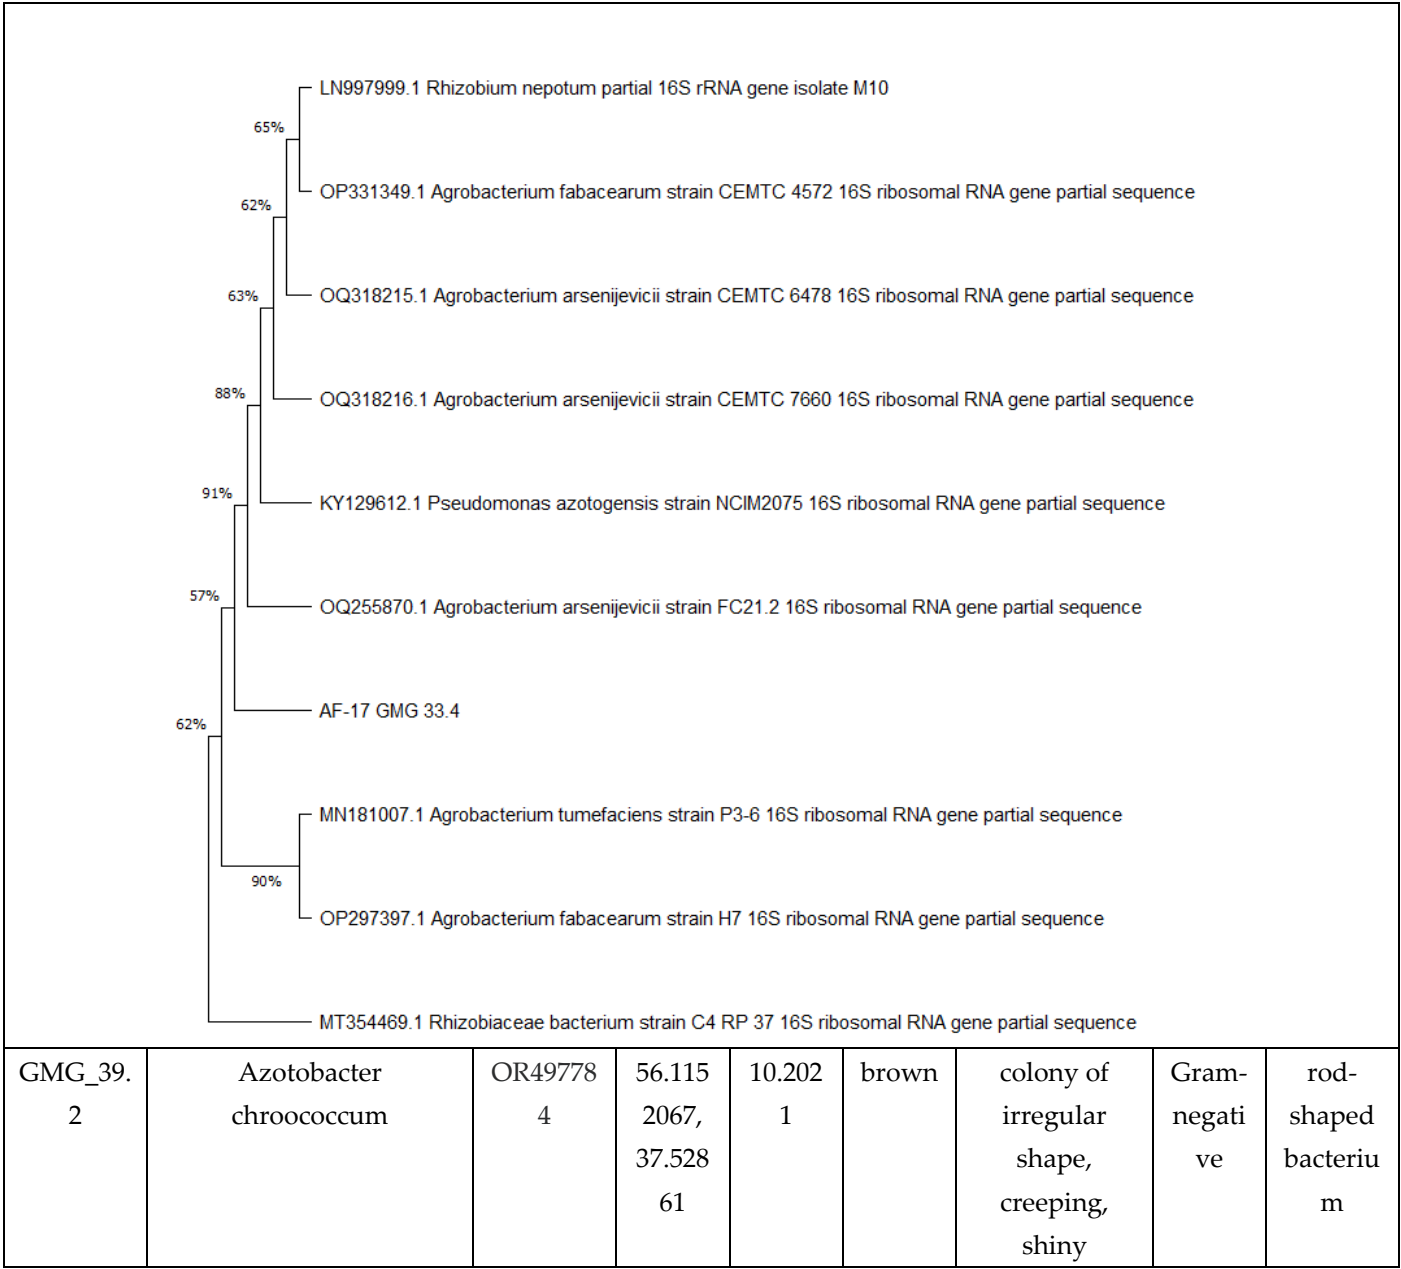

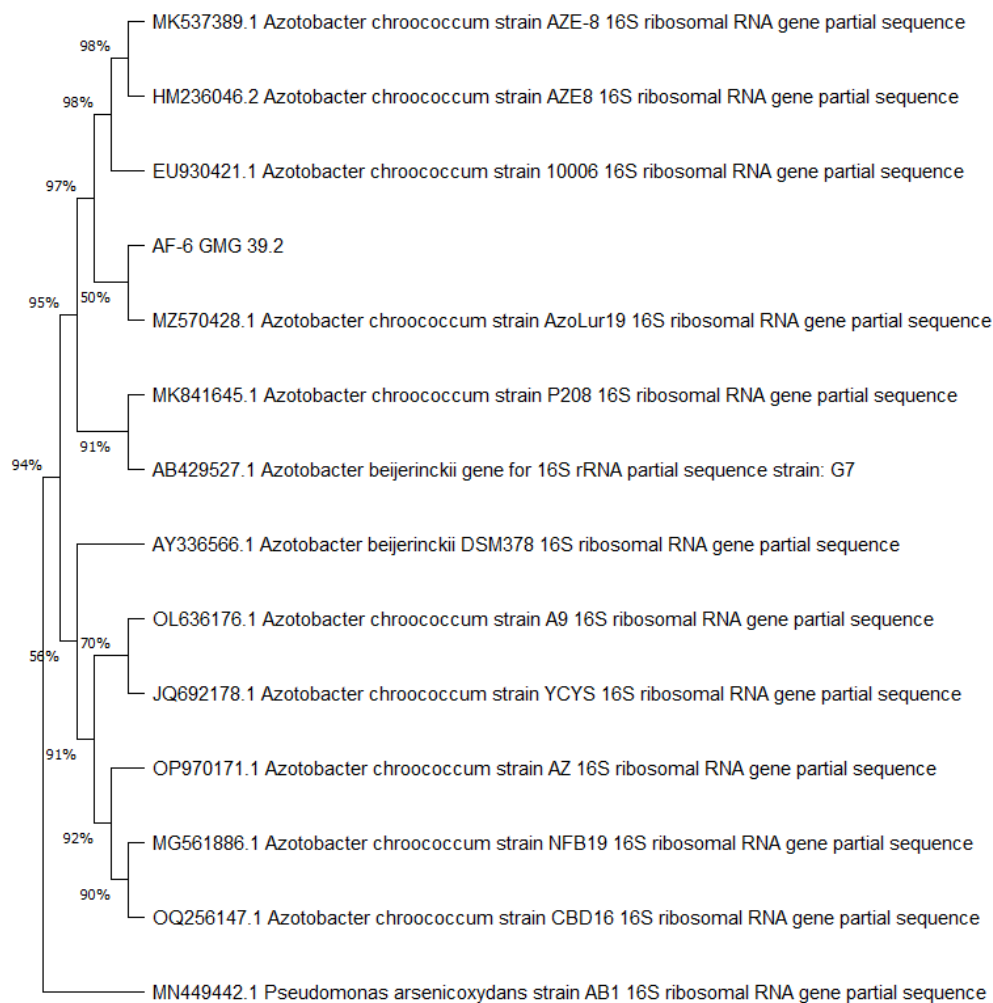

|             |                                            |              |                                                |             |                 |                                                             |                       |                                 |
|-------------|--------------------------------------------|--------------|------------------------------------------------|-------------|-----------------|-------------------------------------------------------------|-----------------------|---------------------------------|
| GMG_21<br>9 | <i>Pseudomonas</i><br><i>kitaguniensis</i> | OR49778<br>0 | 69.302<br>488889<br>,<br>139.96<br>026944<br>4 | 04.202<br>2 | Light<br>yellow | A small, flat<br>colony of 1-2<br>mm, creeping<br>over time | Gram-<br>negati<br>ve | rod-<br>shaped<br>bacteriu<br>m |
|-------------|--------------------------------------------|--------------|------------------------------------------------|-------------|-----------------|-------------------------------------------------------------|-----------------------|---------------------------------|

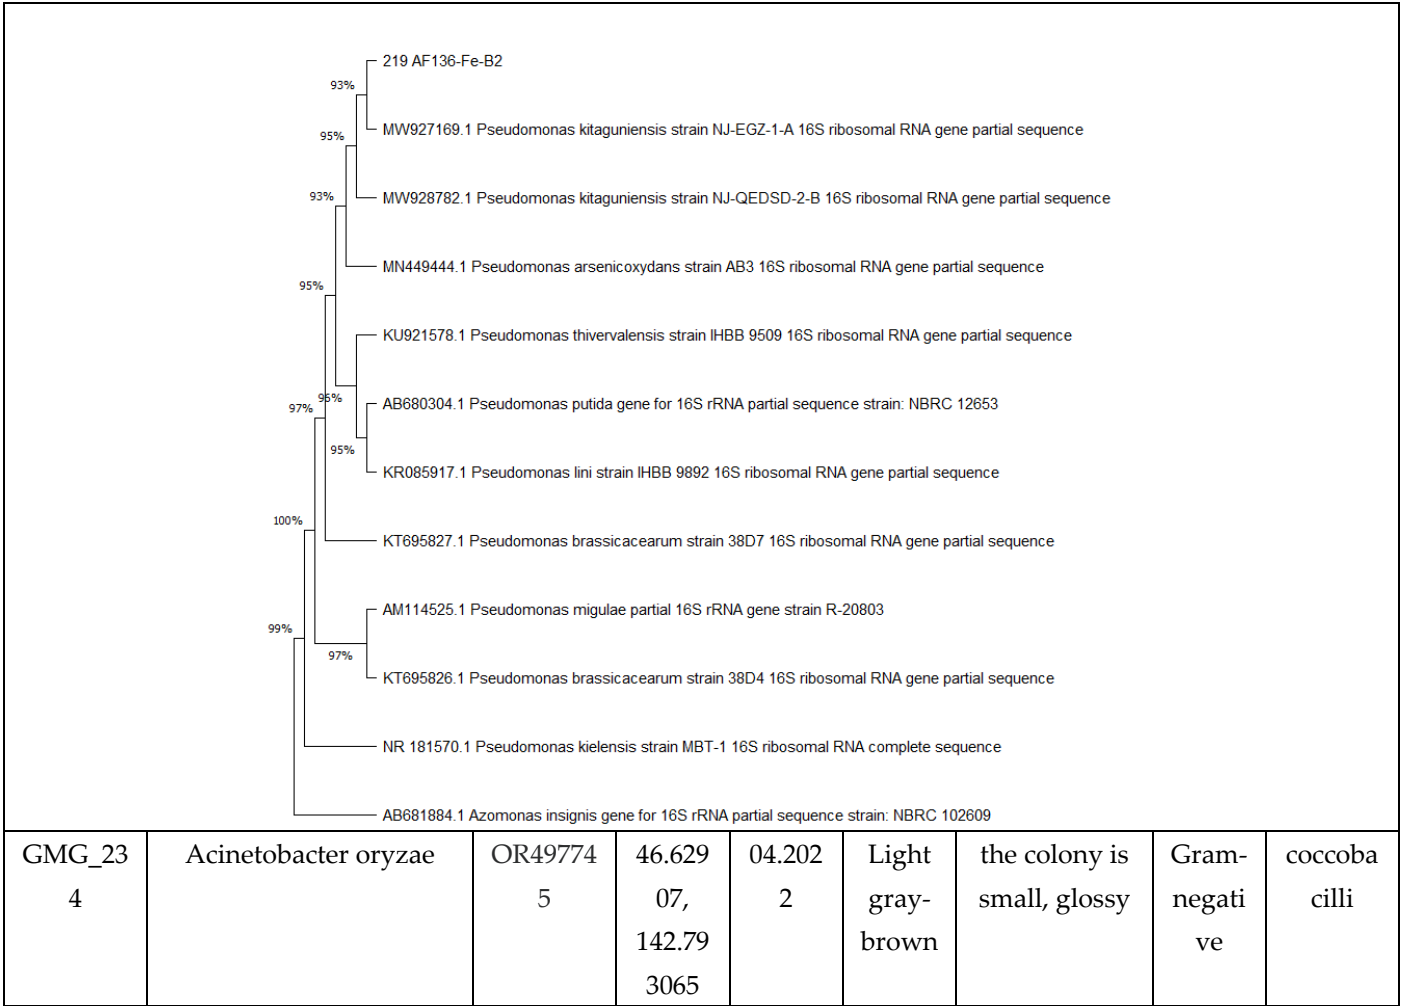

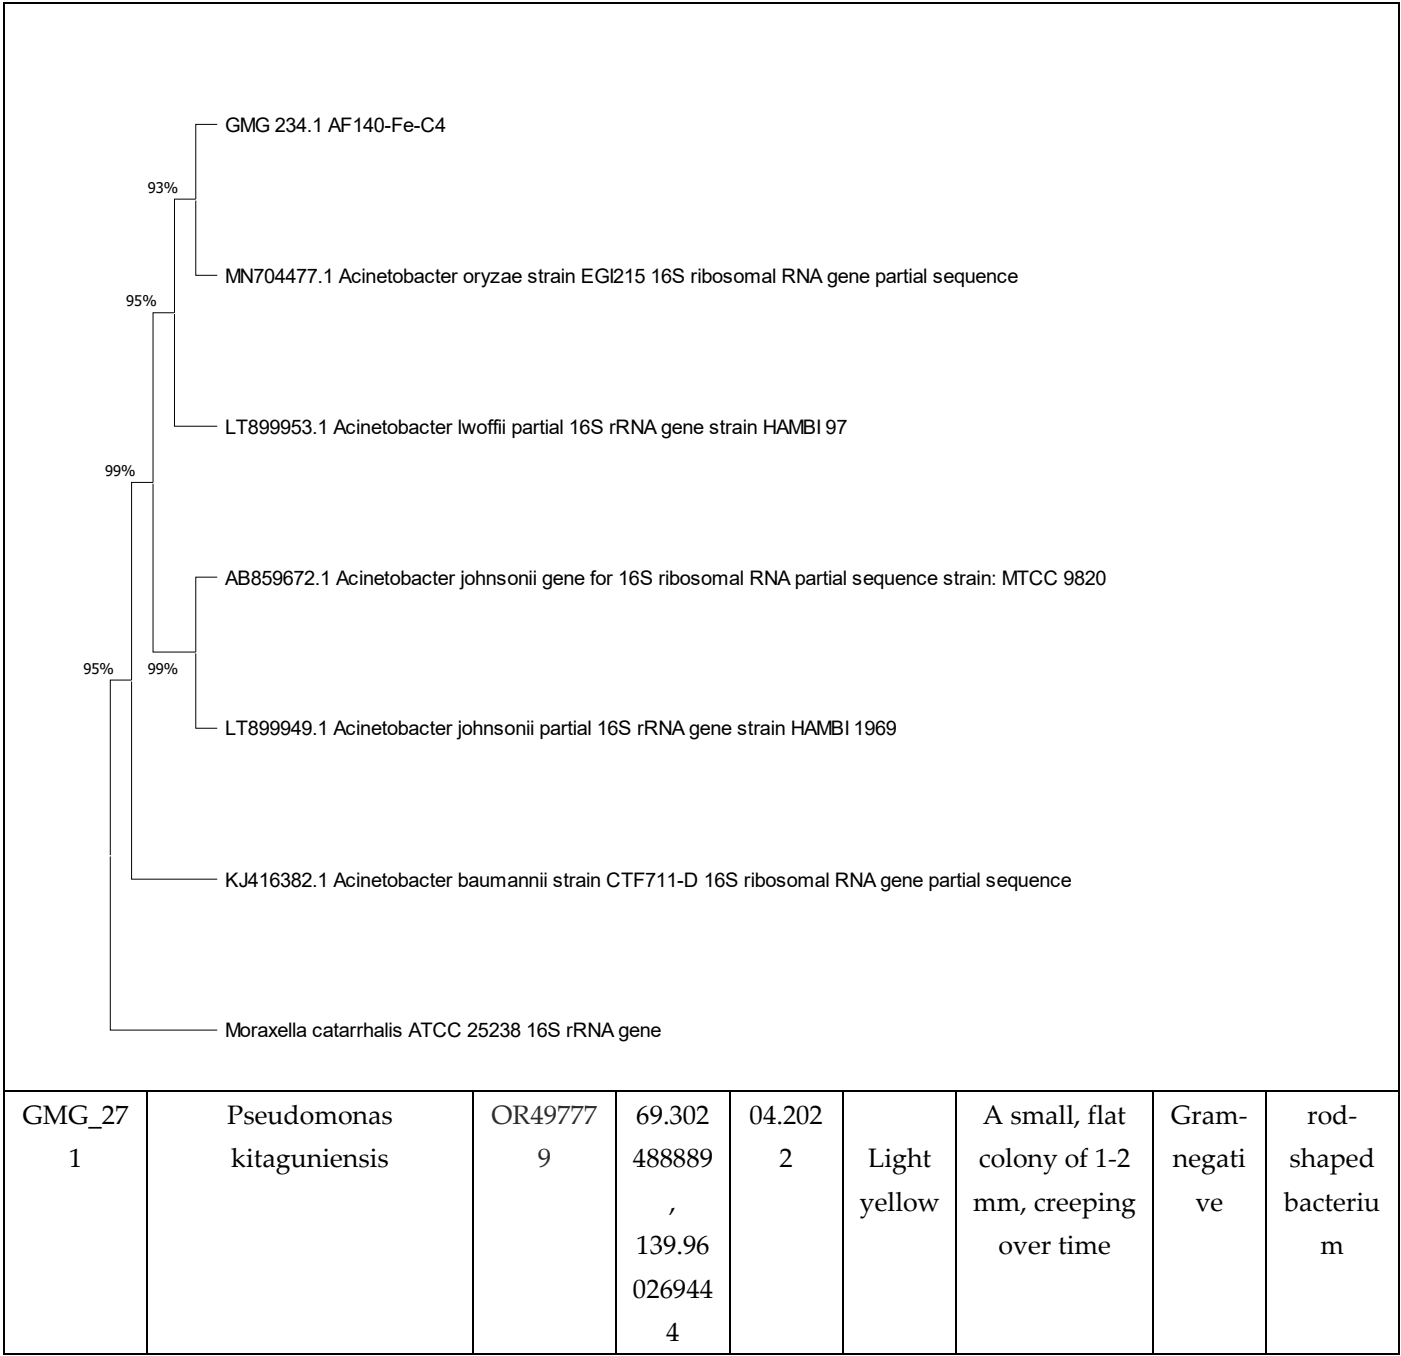

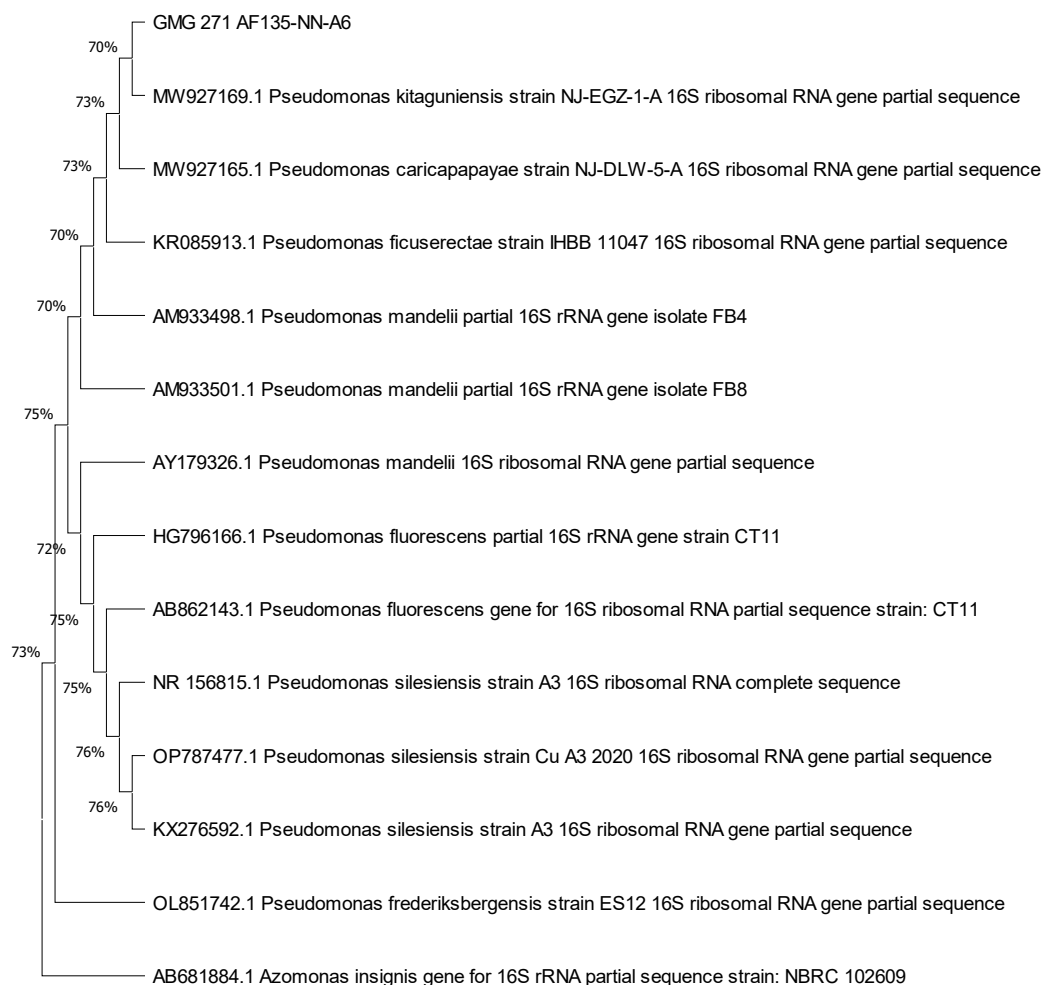

|             |                              |              |                                 |             |       |                                                          |                       |                                 |
|-------------|------------------------------|--------------|---------------------------------|-------------|-------|----------------------------------------------------------|-----------------------|---------------------------------|
| GMG_27<br>8 | <i>Enterobacter ludwigii</i> | OQ72737<br>6 | 46.962<br>08,<br>142.75<br>7798 | 04.202<br>2 | beige | The colony is<br>convex with a<br>smooth edge,<br>glossy | Gram-<br>negati<br>ve | rod-<br>shaped<br>bacteriu<br>m |
|-------------|------------------------------|--------------|---------------------------------|-------------|-------|----------------------------------------------------------|-----------------------|---------------------------------|

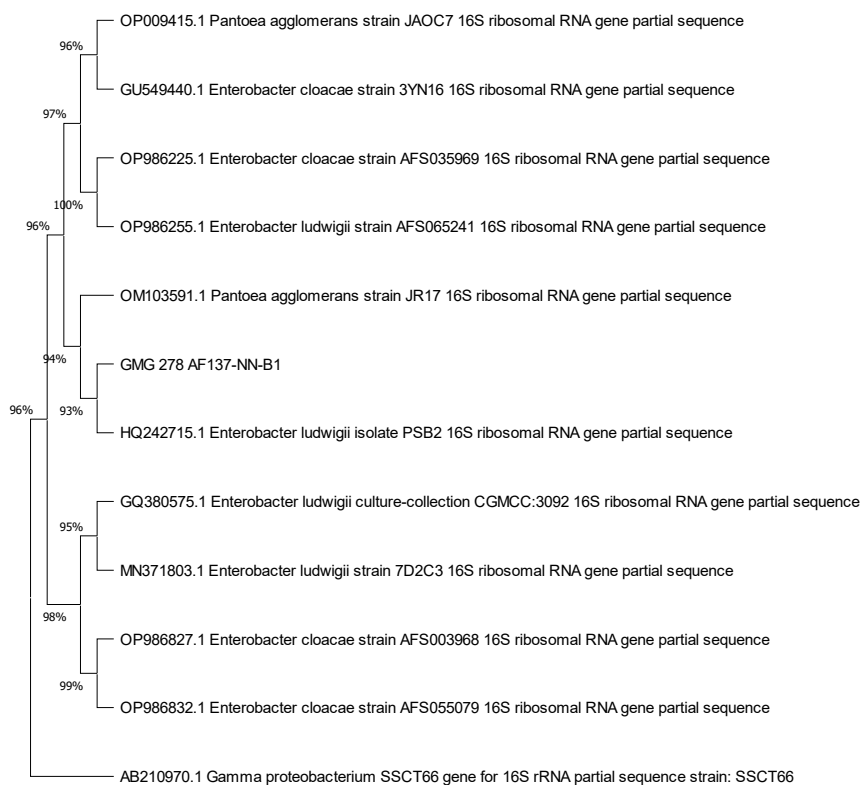

|             |                    |              |                                 |             |       |                                                                                               |               |               |
|-------------|--------------------|--------------|---------------------------------|-------------|-------|-----------------------------------------------------------------------------------------------|---------------|---------------|
| GMG_28<br>7 | Rahnella aquatilis | OR49774<br>6 | 46.629<br>07,<br>142.79<br>3065 | 04.202<br>2 | beige | The average colony is 3-4 mm, glossy, with time a creeping transparent rhizoid edge is formed | Gram-negative | rod bacterium |
|-------------|--------------------|--------------|---------------------------------|-------------|-------|-----------------------------------------------------------------------------------------------|---------------|---------------|

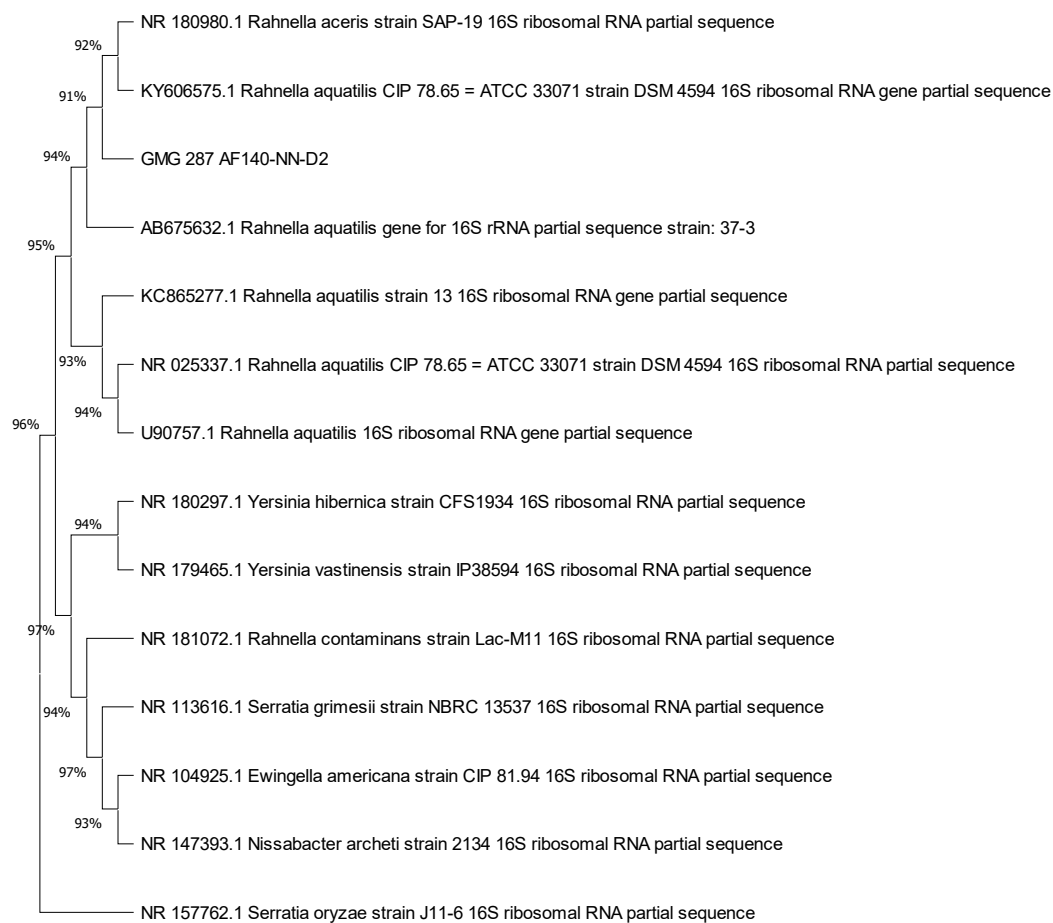

|             |                               |              |                                 |             |                 |                                                  |                       |                      |
|-------------|-------------------------------|--------------|---------------------------------|-------------|-----------------|--------------------------------------------------|-----------------------|----------------------|
| GMG_28<br>8 | <i>Enterobacter amnigenus</i> | OR49774<br>7 | 46.629<br>07,<br>142.79<br>3065 | 04.202<br>2 | Light<br>yellow | Convex<br>colony with<br>smooth<br>edges, glossy | Gram-<br>negati<br>ve | rod<br>bacteriu<br>m |
|-------------|-------------------------------|--------------|---------------------------------|-------------|-----------------|--------------------------------------------------|-----------------------|----------------------|

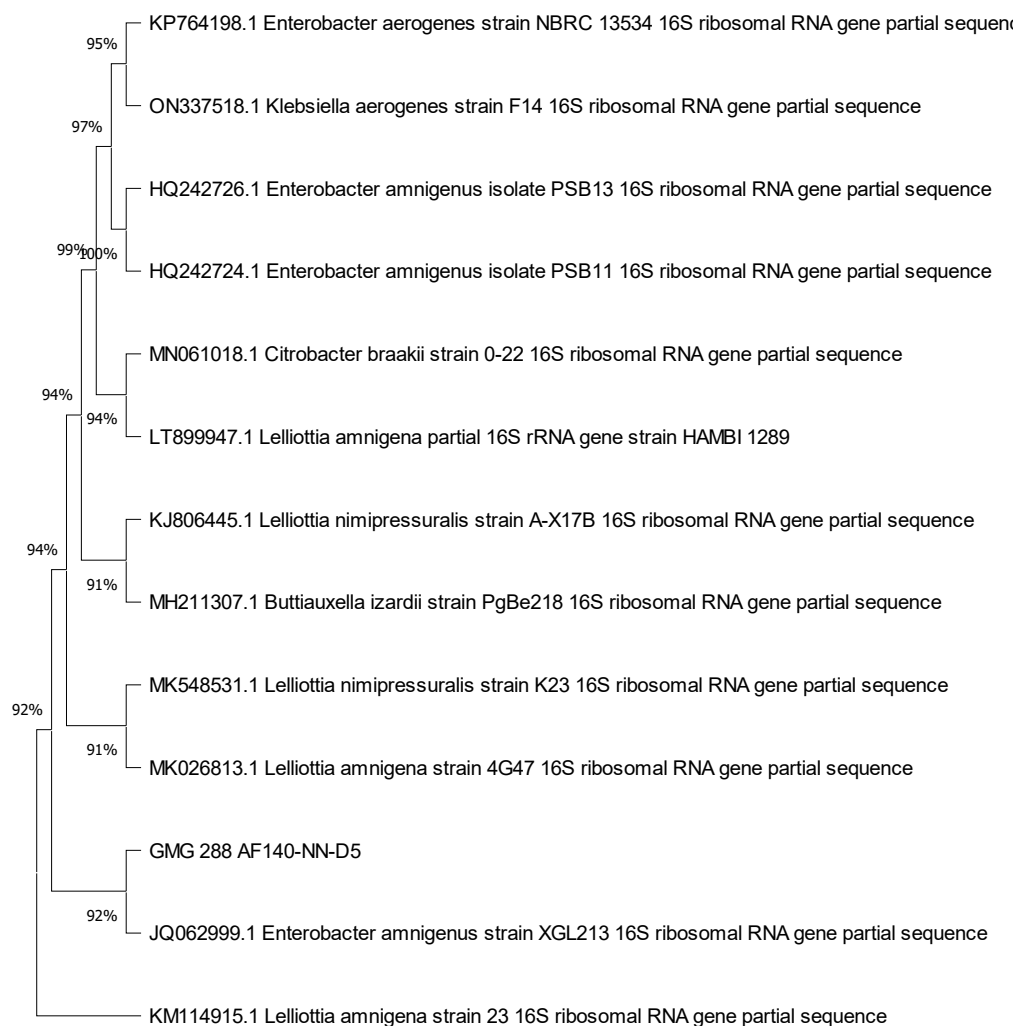

|             |                 |              |                                 |             |       |                                                                                               |               |                      |
|-------------|-----------------|--------------|---------------------------------|-------------|-------|-----------------------------------------------------------------------------------------------|---------------|----------------------|
| GMG_29<br>4 | Rahnella aceris | OR49774<br>8 | 46.629<br>07,<br>142.79<br>3065 | 04.202<br>2 | beige | The average colony is 3-4 mm, glossy, with time a creeping transparent rhizoid edge is formed | Gram-negative | rod-shaped bacterium |
|-------------|-----------------|--------------|---------------------------------|-------------|-------|-----------------------------------------------------------------------------------------------|---------------|----------------------|



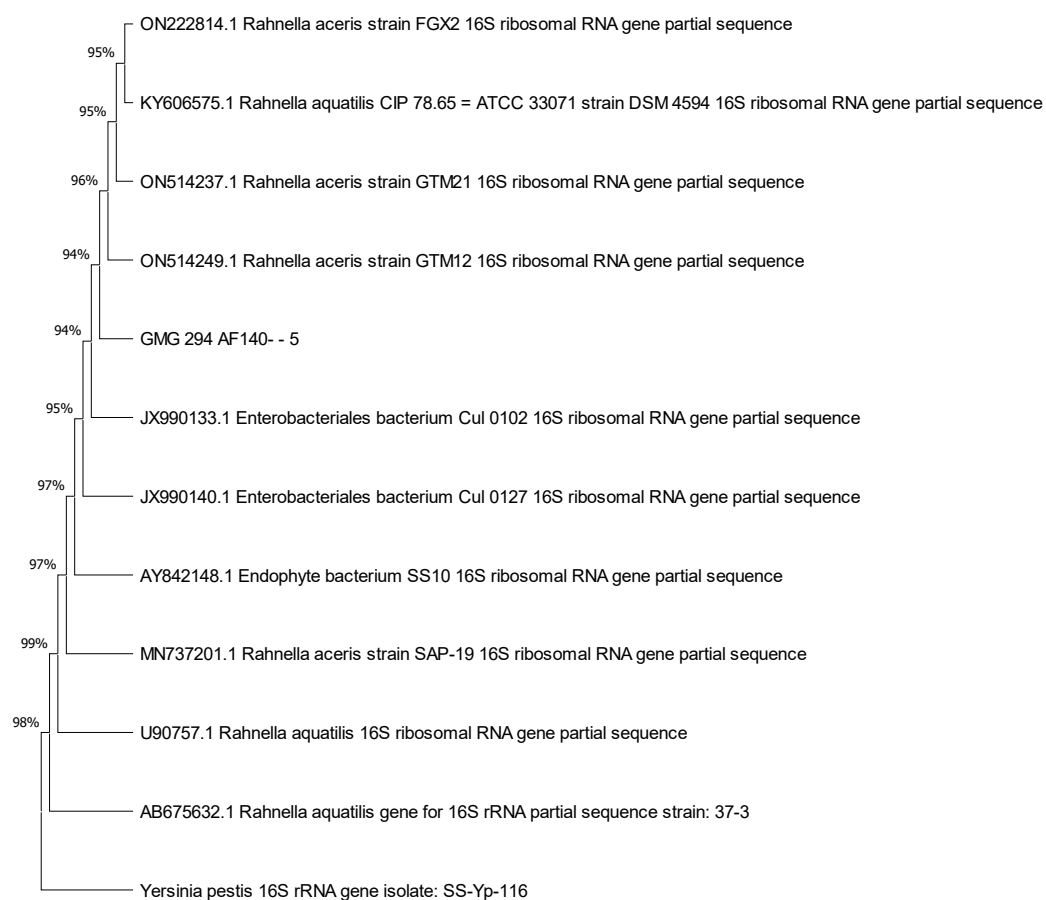

Supplement: s1 [file s1]
